# Supplementary material
Source: MDPI journal article supplement (https://www.mdpi.com/1424-8247/15/3/280)
Supplement: s1 [file s1]

# Design, Synthesis, Molecular Docking, and Biological Evaluation of Pyrazole Hybrid Chalcone Conjugates as Potential Anticancer Agents and Tubulin Polymerization Inhibitors

Md. Jahangir Alam<sup>1</sup>, Ozair Alam<sup>1,\*</sup>, Ahmad Perwez<sup>2</sup>, Moshahid Alam Rizvi<sup>2</sup>, Mohd Javed Naim<sup>1</sup>, V.G.M. Naidu<sup>3</sup>, Mohd Imran<sup>4</sup>, Mohammed M. Ghoneim<sup>5</sup>, Sultan Alshehri<sup>6</sup> and Faiyaz Shakeel<sup>6</sup>

<sup>1</sup> Medicinal Chemistry and Molecular Modeling Lab, Department of Pharmaceutical Chemistry, School of Pharmaceutical Education and Research, Jamia Hamdard, New Delhi 110062, India; zahangir.jh@gmail.com (M.J.A.), oalam@jamiahamdard.ac.in (O.A.), javednaim88@rediffmail.com (M.J.N.)

<sup>2</sup> Department of Biochemistry and Molecular Biology, Faculty of Bioscience, Jamia Millia Islamia, New Delhi 110020, India; ahmad86.delhi@gmail.com (A.P.), rizvi\_ma@yahoo.com (M.A.R.)

<sup>3</sup> National Institute of Pharmaceutical Education and Research, Guwahati 781101, Assam, India; vgmnaidu@gmail.com

<sup>4</sup> Department of Pharmaceutical Chemistry, Faculty of Pharmacy, Northern Border University, Rafha 91911, Saudi Arabia; imran.pchem@gmail.com

<sup>5</sup> Department of Pharmacy Practice, College of Pharmacy, AlMaarefa University, Ad Diriyah 13713, Saudi Arabia; mghoneim@mcst.edu.sa

<sup>6</sup> Department of Pharmaceutics, College of Pharmacy, King Saud University, Riyadh 11451, Saudi Arabia; salshehri1@ksu.edu.sa (S.A.), fsahmad@ksu.edu.sa (F.S.)

\* Correspondence: oalam@jamiahamdard.ac.in

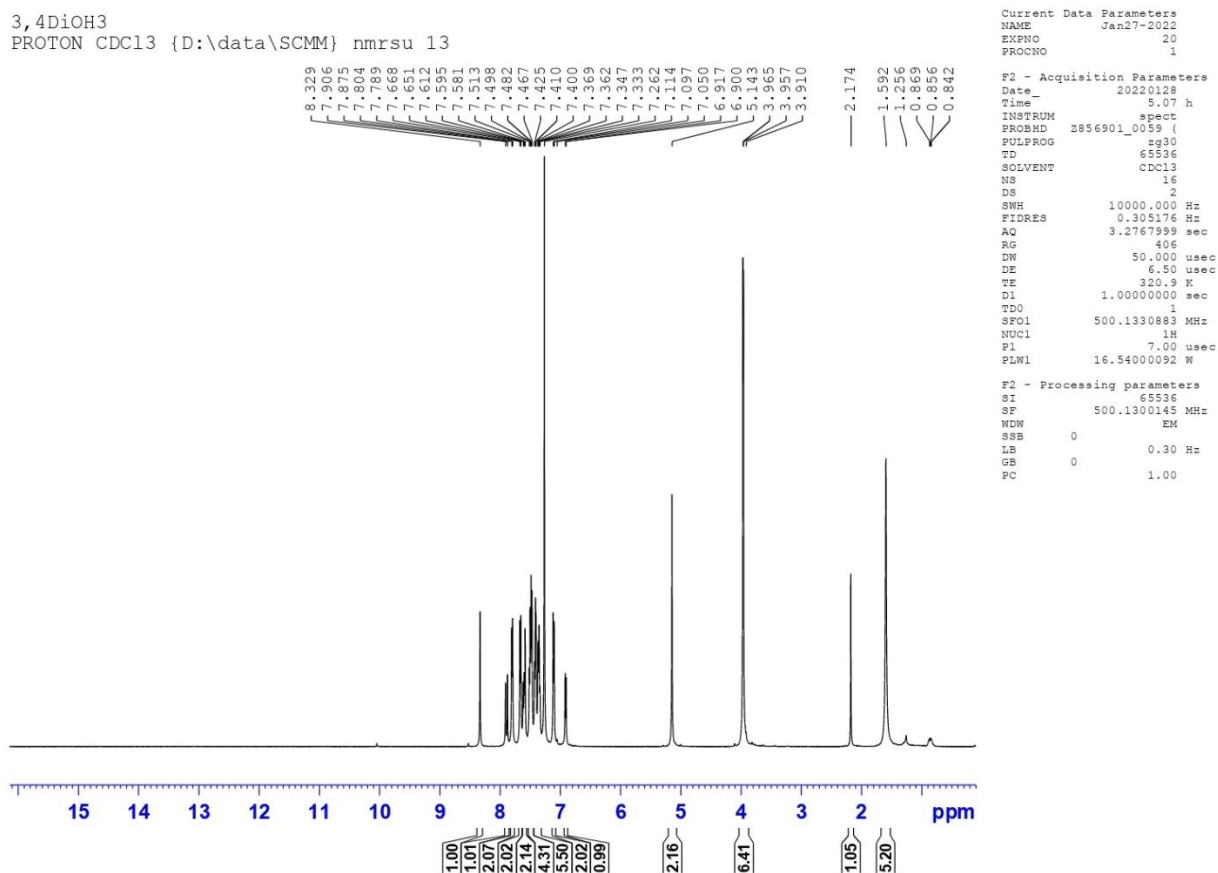

**Figure S1.**  $^1\text{H}$  NMR of (E)-3-(3-(4-(benzyloxy)phenyl)-1-phenyl-1H-pyrazol-4-yl)-1-(3,4-dimethoxyphenyl)prop-2-en-1-one.

3,4DiOH3  
 PROTON CDCl3 {D:\data\SCMM} nmrsu 13

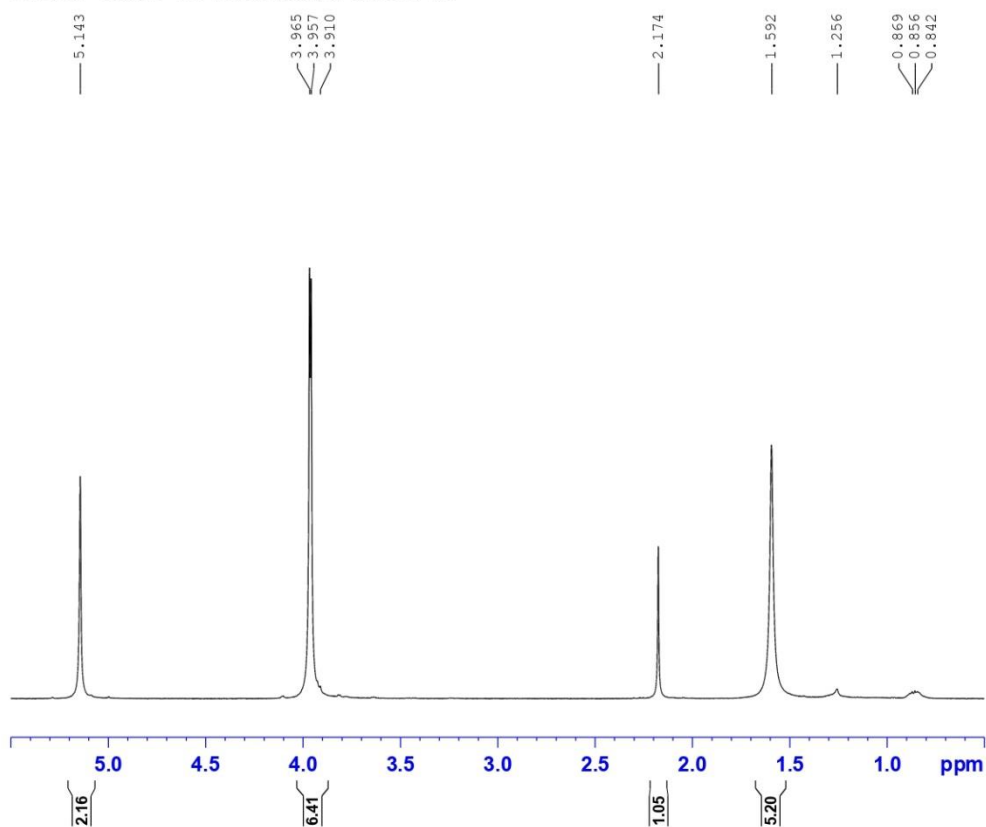

Current Data Parameters  
 NAME Jan27-2022  
 EXPNO 20  
 PROCNO 1

F2 - Acquisition Parameters  
 Date\_ 20220128  
 Time 5.07 h  
 INSTRUM spect  
 PROBHD zg30  
 PULPROG zg30  
 TD 65536  
 SOLVENT CDCl3  
 NS 16  
 DS 2  
 SWH 10000.000 Hz  
 FIDRES 0.305176 Hz  
 AQ 3.2767999 sec  
 RG 408  
 DW 50.000 usec  
 DE 6.50 usec  
 TE 320.9 K  
 D1 1.00000000 sec  
 TDO 1  
 SFO1 500.1330883 MHz  
 NUC1 1H  
 P1 7.00 usec  
 PLW1 16.54000092 W

F2 - Processing parameters  
 SI 65536  
 SF 500.1300145 MHz  
 WDW EM  
 SSB 0  
 LB 0.30 Hz  
 GB 0  
 PC 1.00

**Figure S2.**  $^{13}\text{C}$  NMR of (E)-3-(3-(4-(benzyloxy)phenyl)-1-phenyl-1H-pyrazol-4-yl)-1-(3,4-dimethoxyphenyl)prop-2-en-1-one.

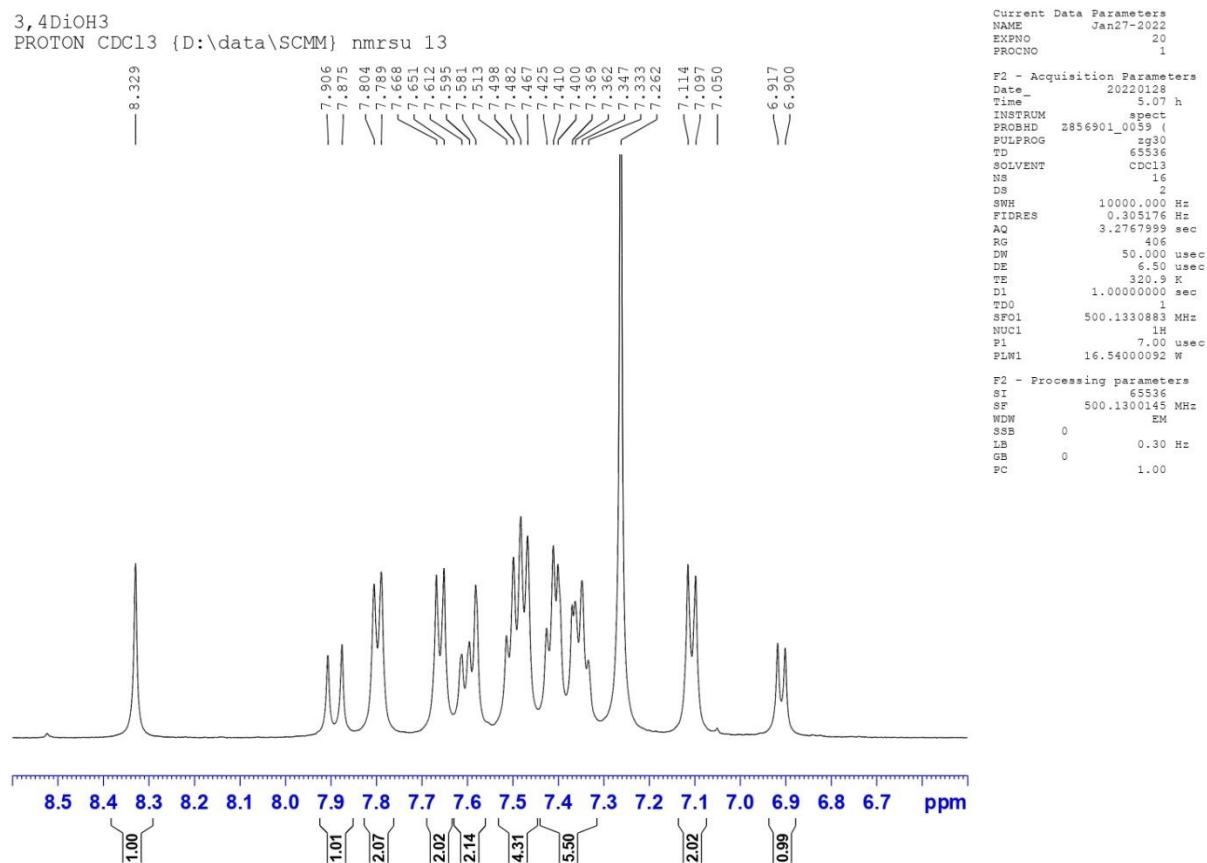

**Figure S3.**  $^1\text{H}$  NMR of (E)-3-(3-(4-(benzyloxy)phenyl)-1-phenyl-1H-pyrazol-4-yl)-1-(3,4-dimethoxyphenyl)prop-2-en-1-one.

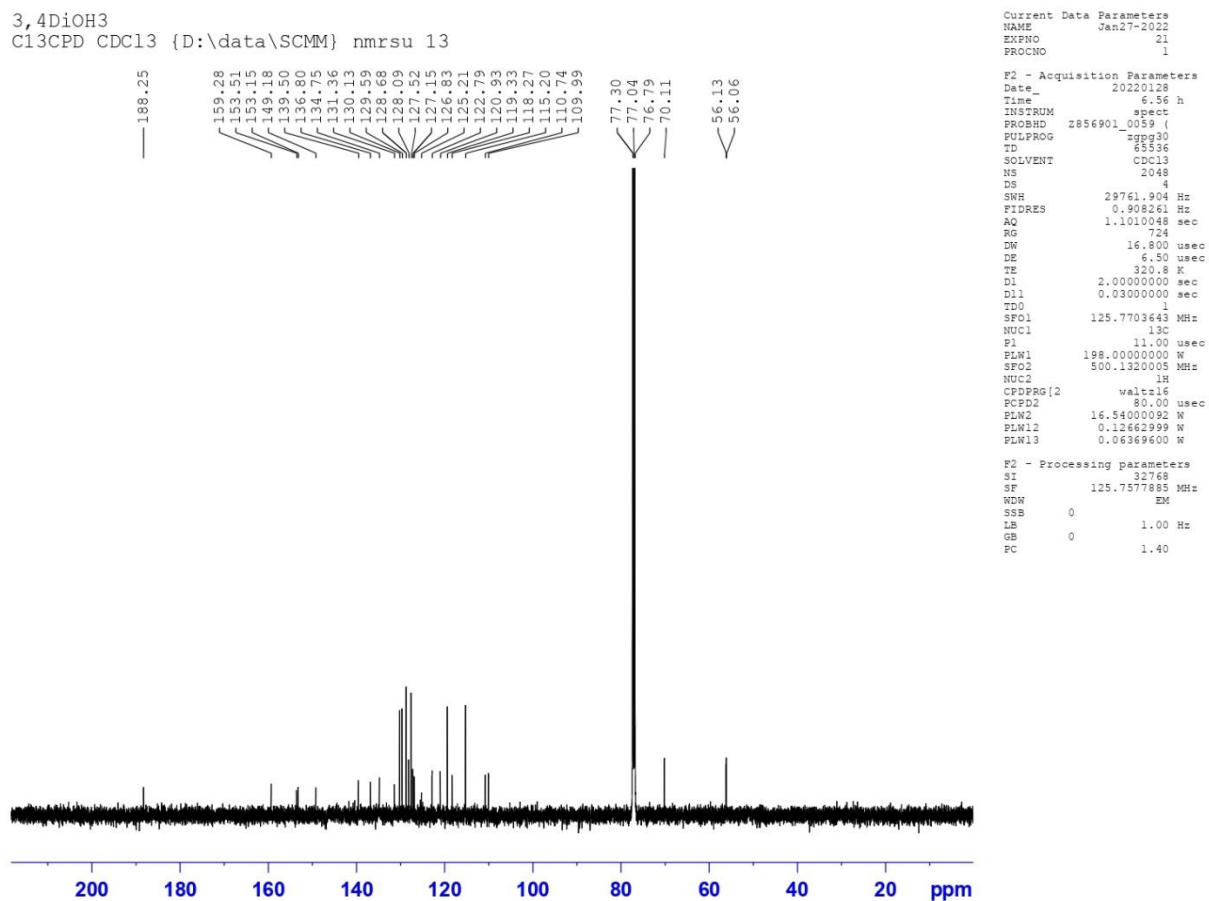

**Figure S4.**  $^{13}\text{C}$  NMR of (E)-3-(3-(4-(benzyloxy)phenyl)-1-phenyl-1H-pyrazol-4-yl)-1-(3,4-dimethoxyphenyl)prop-2-en-1-one.

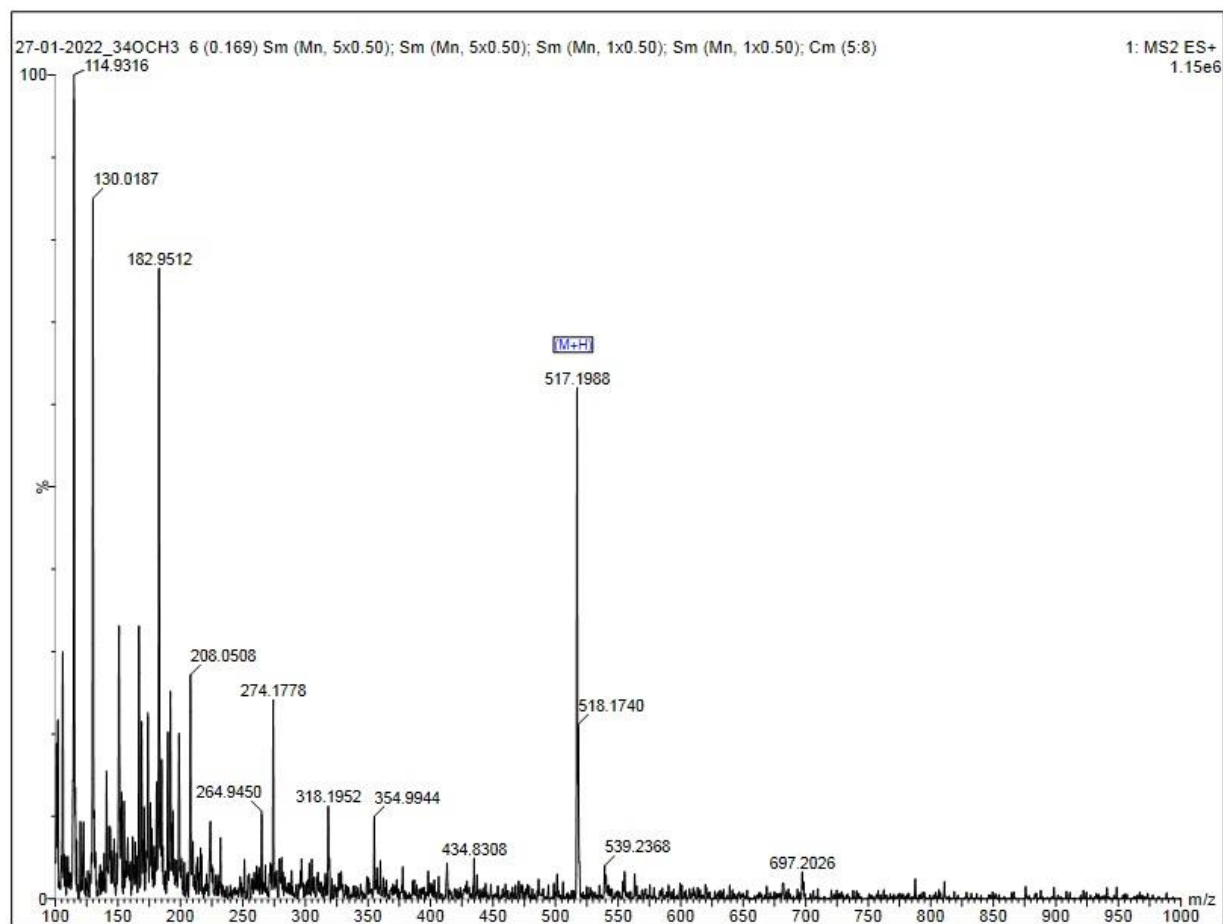

**Figure S5.** Mass spectra of (E)-3-(3-(4-(benzyloxy)phenyl)-1-phenyl-1H-pyrazol-4-yl)-1-(3,4-dimethoxyphenyl)prop-2-en-1-one.

4-Br  
 PROTON CDCl3 {D:\data\SCMM} nmrsu 15

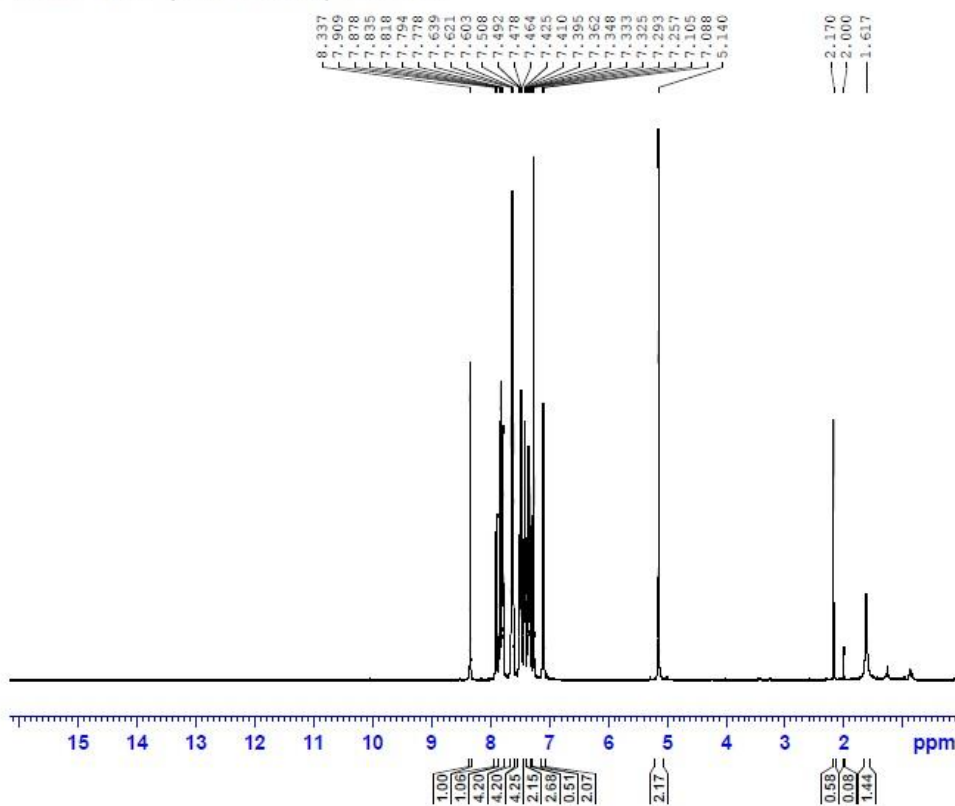

Current Data Parameters  
 NAME Jan27-2022  
 EXPNO 24  
 PROCNO 1

F2 - Acquisition Parameters  
 Date 20220128  
 Time 8.54 h  
 INSTRUM spect  
 PROBHD Z856901\_0059 (1  
 PULPROG zg30  
 TD 65536  
 SOLVENT CDCl3  
 NS 16  
 DS 2  
 SWH 10000.000 Hz  
 FIDRES 0.305176 Hz  
 AQ 3.2767999 sec  
 RG 128  
 LW 50.000 usec  
 DE 6.50 usec  
 TE 320.6 K  
 D1 1.00000000 sec  
 TDO 1  
 SFO1 500.1330883 MHz  
 NUC1 1H  
 P1 7.00 usec  
 PLM1 16.54000092 W

F2 - Processing parameters  
 SI 65536  
 SF 500.1300156 MHz  
 WDW EM  
 SSB 0  
 LB 0.30 Hz  
 GB 0  
 PC 1.00

Figure S6. <sup>1</sup>H NMR of (E)-3-(3-(4-(benzyloxy)phenyl)-1-phenyl-1H-pyrazol-4-yl)-1-(4-bromophenyl)prop-2-en-1-one.

4-Br  
 PROTON CDC13 {D:\data\SCMM} nmrsu 15

Current Data Parameters  
 NAME Jan27-2022  
 EXPNO 24  
 PROCNO 1  
 F2 - Acquisition Parameters  
 Date\_ 20220128  
 Time 8.54 h  
 INSTRUM spect  
 PROBHD zg30  
 PULPROG zg30  
 TD 65536  
 SOLVENT CDC13  
 NS 16  
 DS 2  
 SWH 10000.000 Hz  
 FIDRES 0.305176 Hz  
 AQ 3.2767999 sec  
 RG 128  
 DW 50.000 usec  
 DE 6.50 usec  
 TE 320.6 K  
 D1 1.00000000 sec  
 TD0 1  
 SFO1 500.1330883 MHz  
 NUCL1 1H  
 PL 7.00 usec  
 PLW1 16.54000092 W  
 F2 - Processing parameters  
 SI 65536  
 SF 500.1300156 MHz  
 WDW EM  
 SSB 0  
 LB 0.30 Hz  
 GB 0  
 PC 1.00

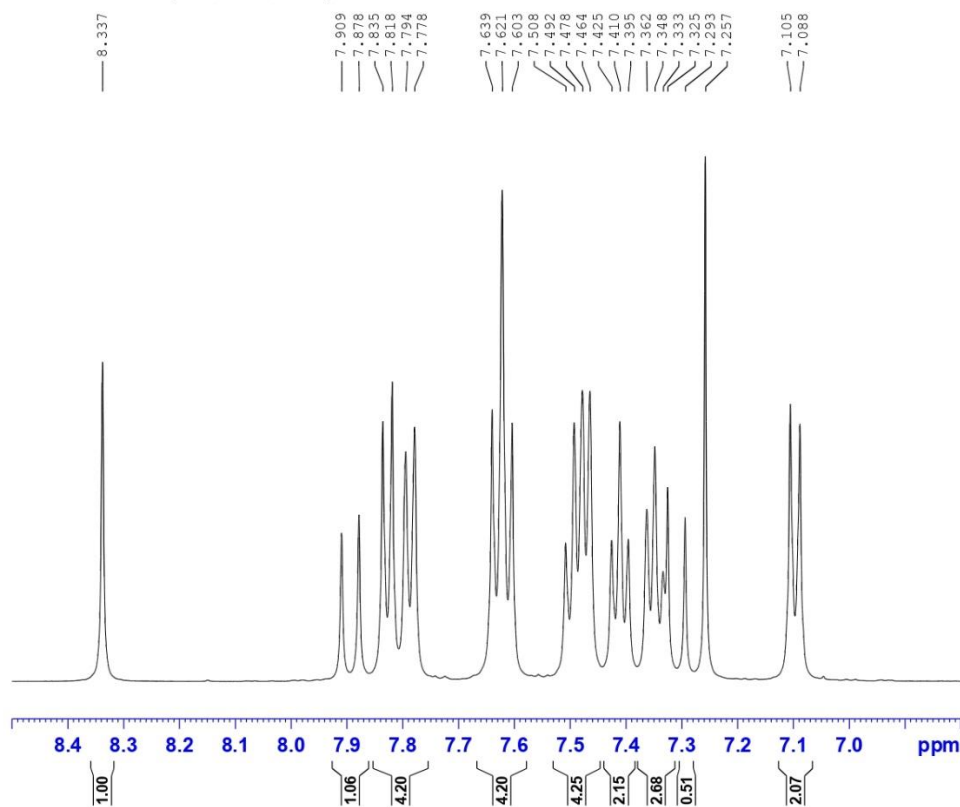

Figure S7. <sup>1</sup>H NMR of (E)-3-(3-(4-(benzyloxy)phenyl)-1-phenyl-1H-pyrazol-4-yl)-1-(4-bromophenyl)prop-2-en-1-one.



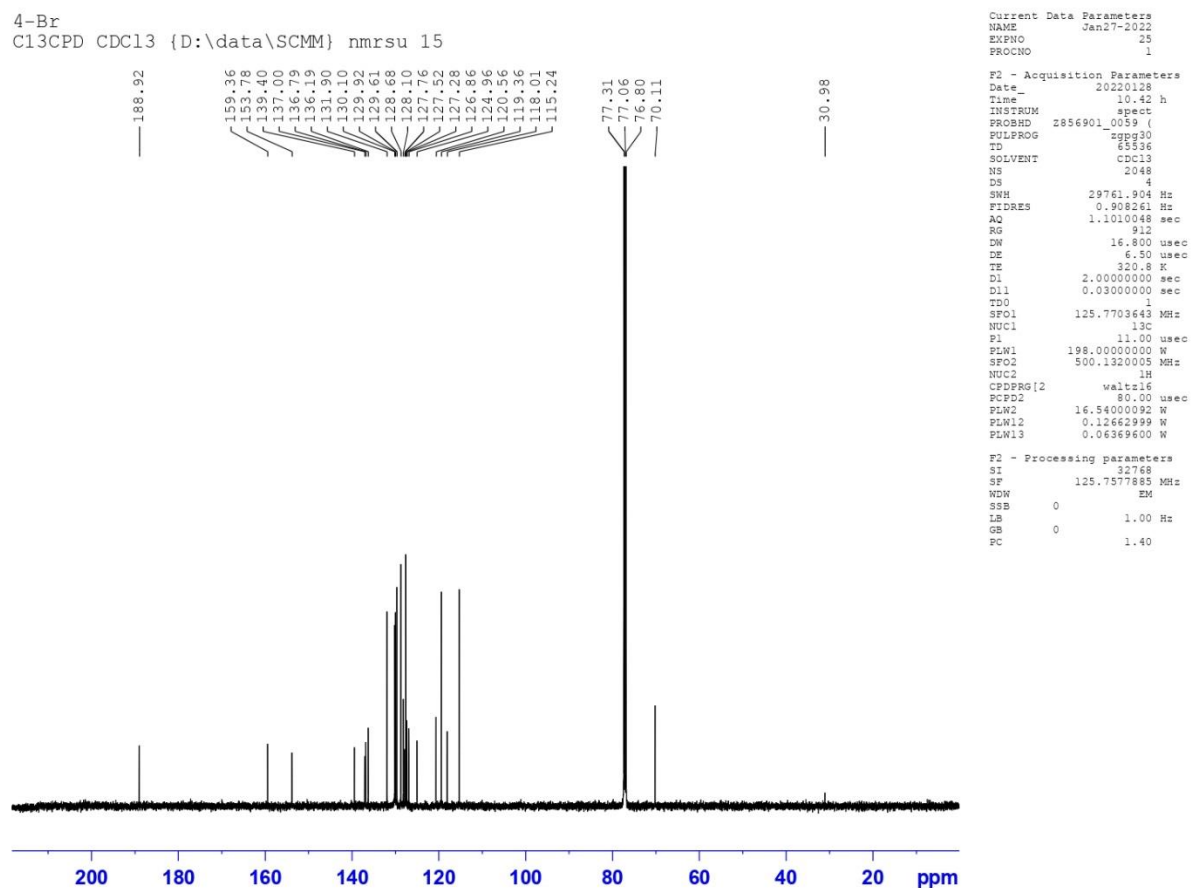

**Figure S8.**  $^{13}\text{C}$  NMR of (E)-3-(3-(4-(benzyloxy)phenyl)-1-phenyl-1H-pyrazol-4-yl)-1-(4-bromophenyl)prop-2-en-1-one.

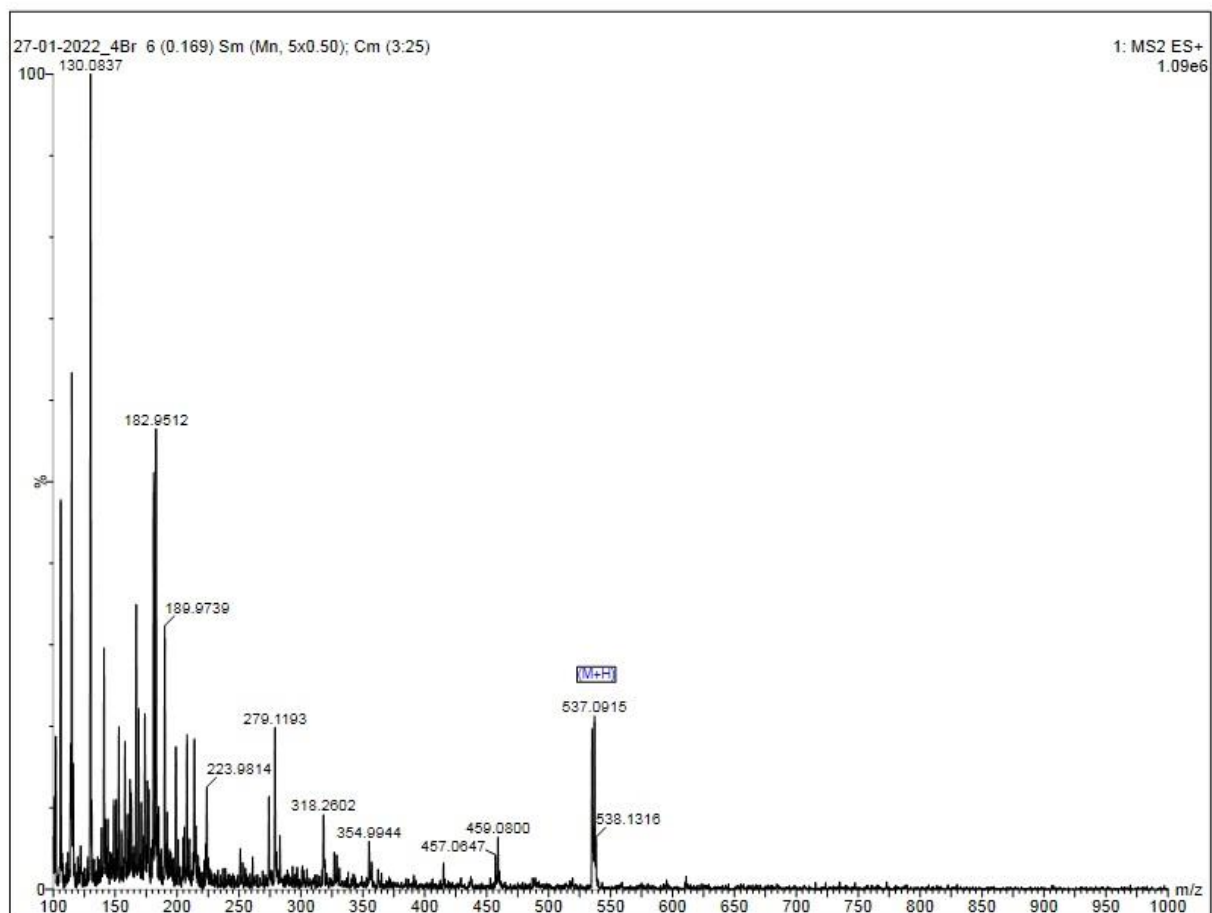

**Figure S9.** Mass spectra of (E)-3-(3-(4-(benzyloxy)phenyl)-1-phenyl-1H-pyrazol-4-yl)-1-(4-bromophenyl)prop-2-en-1-one.

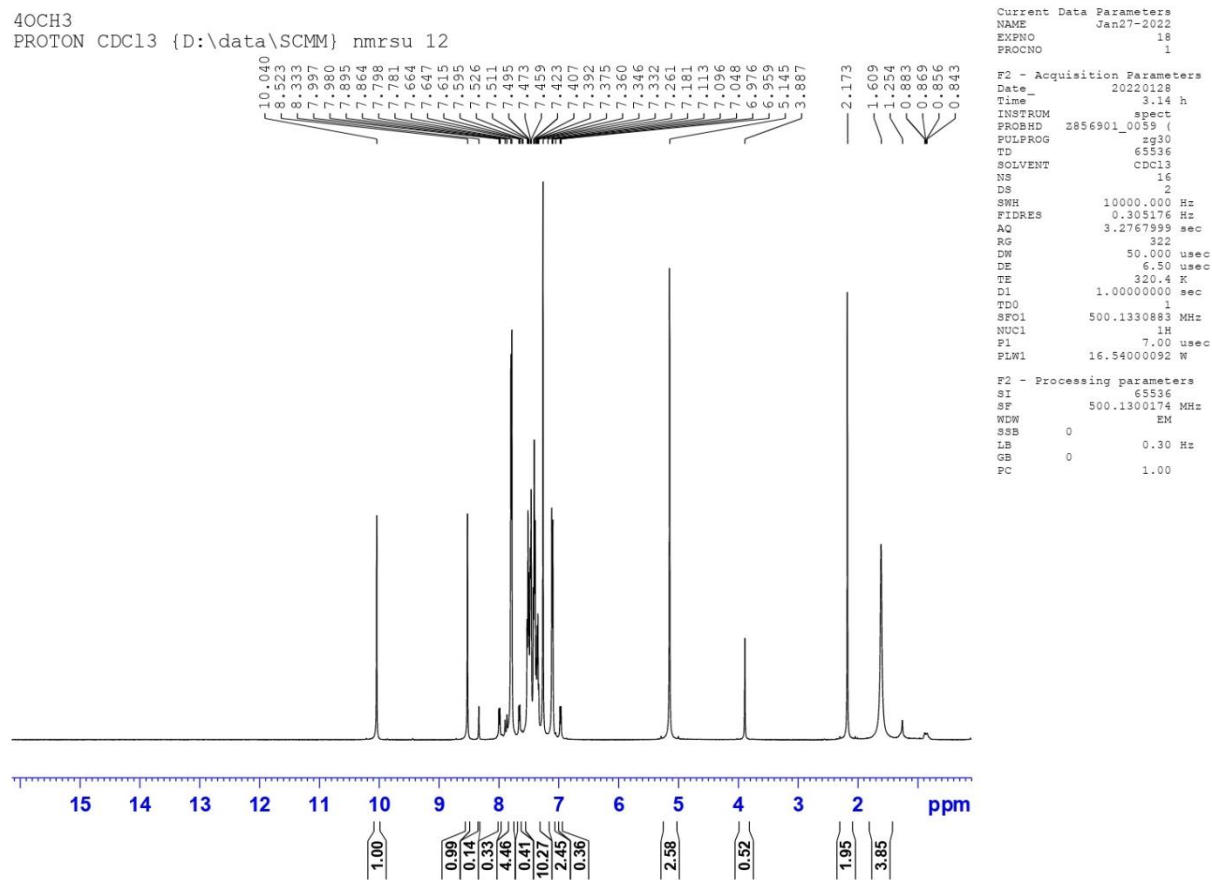

**Figure S10.**  $^1\text{H}$  NMR of (E)-3-(3-(4-(benzyloxy)phenyl)-1-phenyl-1H-pyrazol-4-yl)-1-(4-methoxyphenyl)prop-2-en-1-one.

40CH3  
PROTON CDC13 {D:\data\SCMM} nmrsu 12

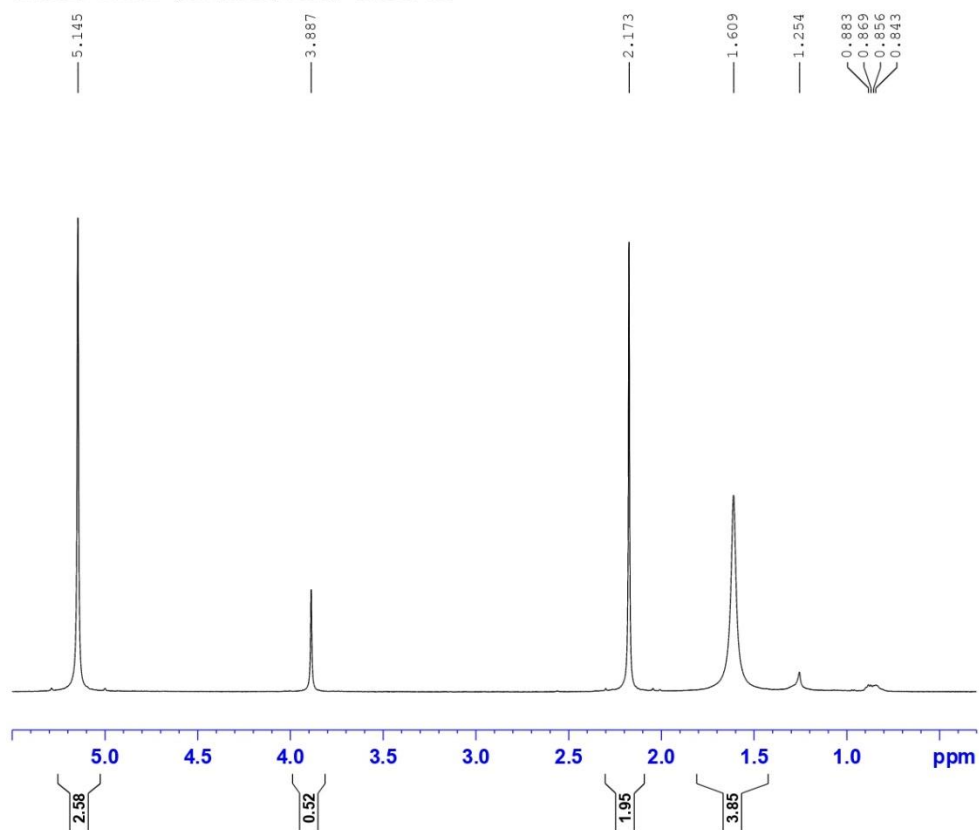

Current Data Parameters  
NAME Jan27-2022  
EXPNO 18  
PROCNO 1

F2 - Acquisition Parameters  
Date\_ 20220128  
Time 3.14 h  
INSTRUM spect  
PROBHD 2856901\_0059 (   
PULPROG zg30  
TD 65536  
SOLVENT CDC13  
NS 16  
DS 2  
SWH 10000.000 Hz  
FIDRES 0.305176 Hz  
AQ 3.2767999 sec  
RG 322  
DW 50.000 usec  
DE 6.50 usec  
TE 320.4 K  
D1 1.00000000 sec  
TD0 1  
SFO1 500.1330883 MHz  
NUC1 1H  
P1 7.00 usec  
PLW1 16.54000092 W

F2 - Processing parameters  
SI 65536  
SF 500.1300174 MHz  
WDW EM  
SSB 0  
LB 0.30 Hz  
GB 0  
PC 1.00

**Figure S11.**  $^1\text{H}$  NMR of (E)-3-(3-(4-(benzyloxy)phenyl)-1-phenyl-1H-pyrazol-4-yl)-1-(4-methoxyphenyl)prop-2-en-1-one.

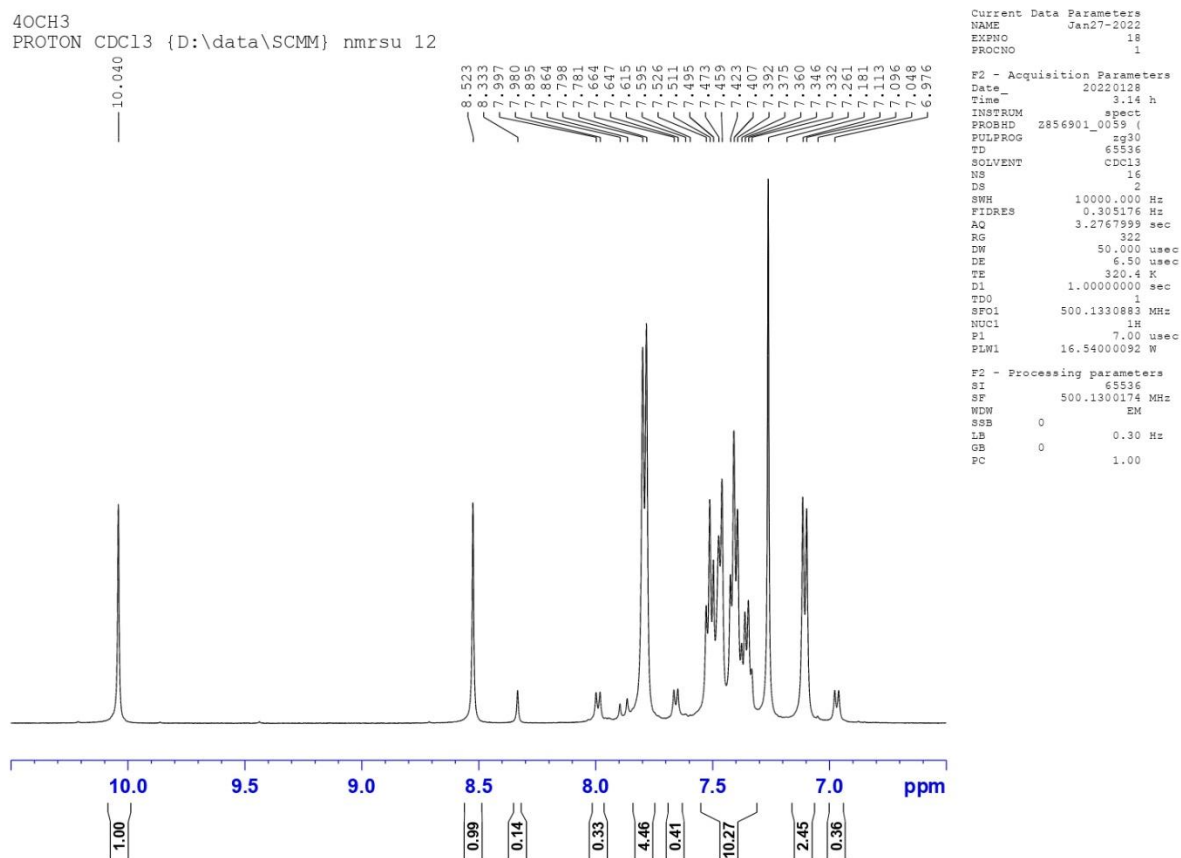

**Figure S12.**  $^1\text{H}$  NMR of (E)-3-(3-(4-(benzyloxy)phenyl)-1-phenyl-1H-pyrazol-4-yl)-1-(4-methoxyphenyl)prop-2-en-1-one.

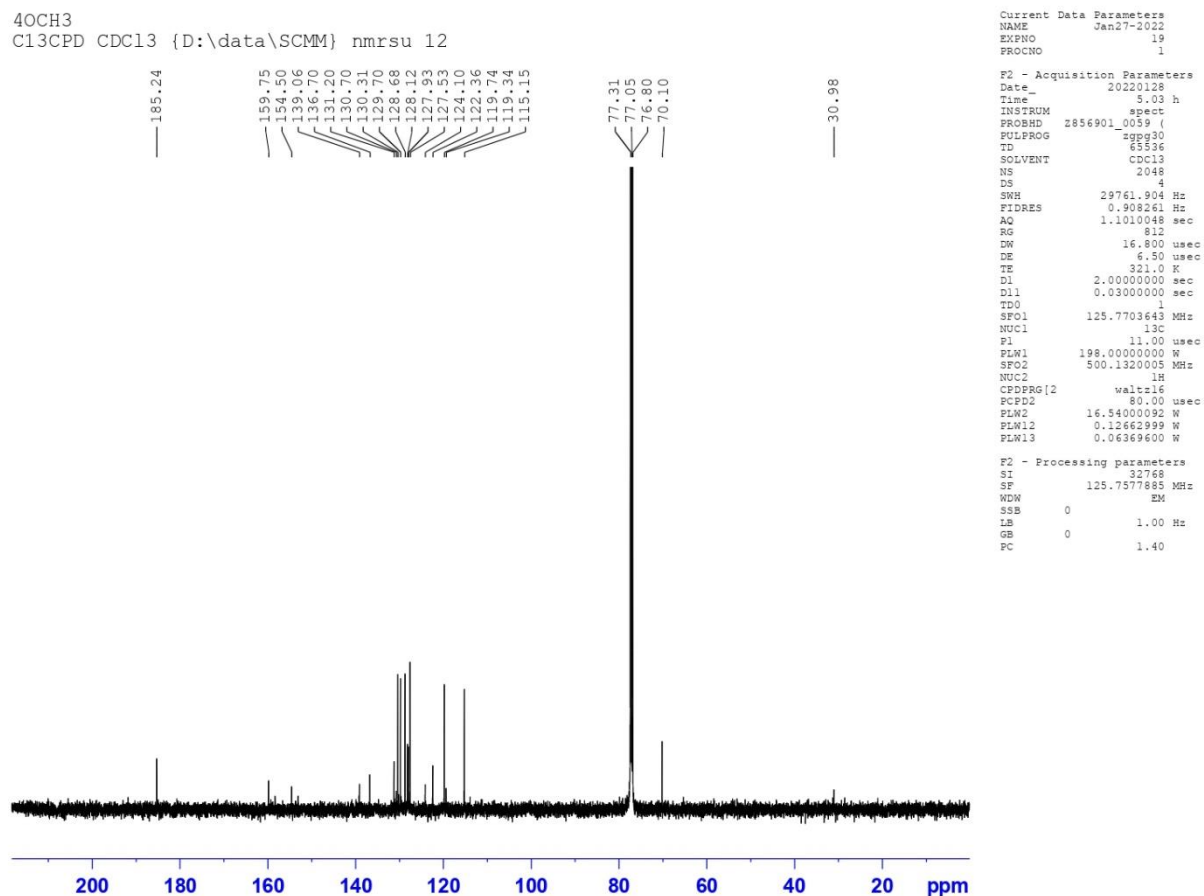

**Figure S13.**  $^{13}\text{C}$  NMR of (E)-3-(3-(4-(benzyloxy)phenyl)-1-phenyl-1H-pyrazol-4-yl)-1-(4-methoxyphenyl)prop-2-en-1-one.

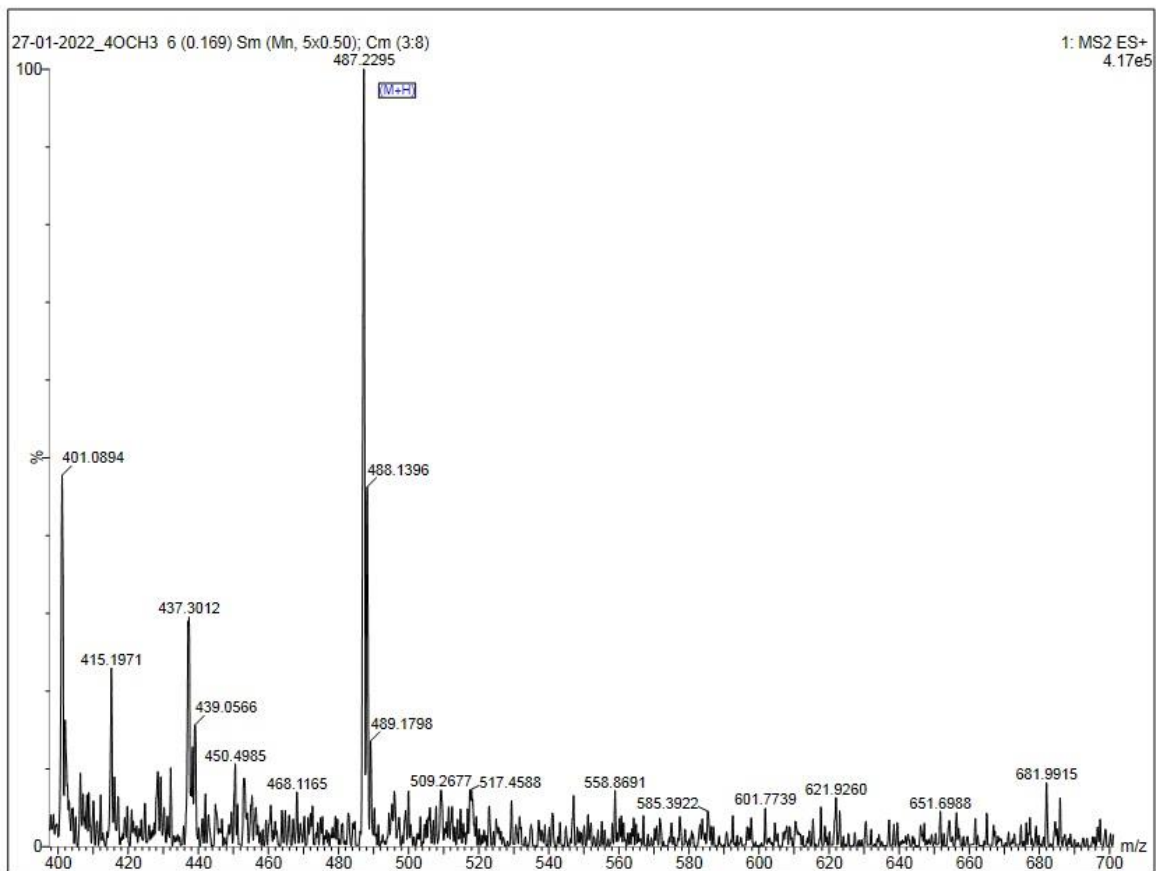

**Figure S14.** Mass spectra of (E)-3-(3-(4-(benzyloxy)phenyl)-1-phenyl-1H-pyrazol-4-yl)-1-(4-methoxyphenyl)prop-2-en-1-one.

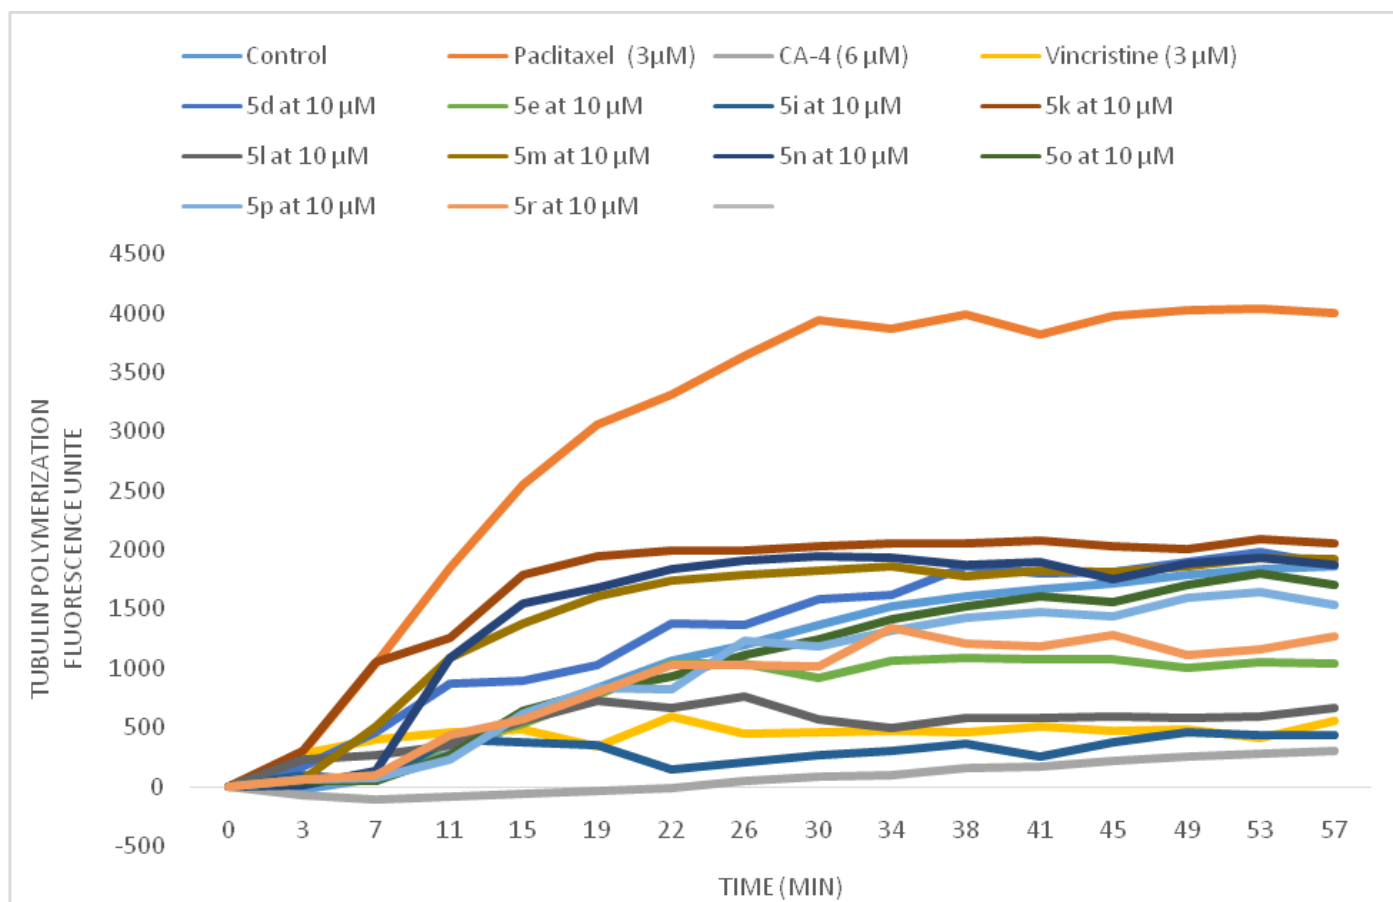

**Figure S15.** Effect of lead conjugates **5d**, **5e**, **5i**, **5k**, **5l**, **5m**, **5n**, **5o**, **5p** and **5r** on tubulin polymerization: Tubulin polymerization was monitored by the increase in fluorescence at 360 nm (excitation) and 420 nm (emission) for 1 h at 37 °C. Combretastatin A-4 was used as the reference standard in this study.
